# Supplementary material
Source: Springer Nature journal article supplement (https://www.springerprofessional.de/resource/supplementary/40192_2013_13_MOESM10_ESM.pdf/11899492)

AR ■ URD30 ■ PSRD30 ■ BB30 ■ PSTD30 ■ UTD30 ■

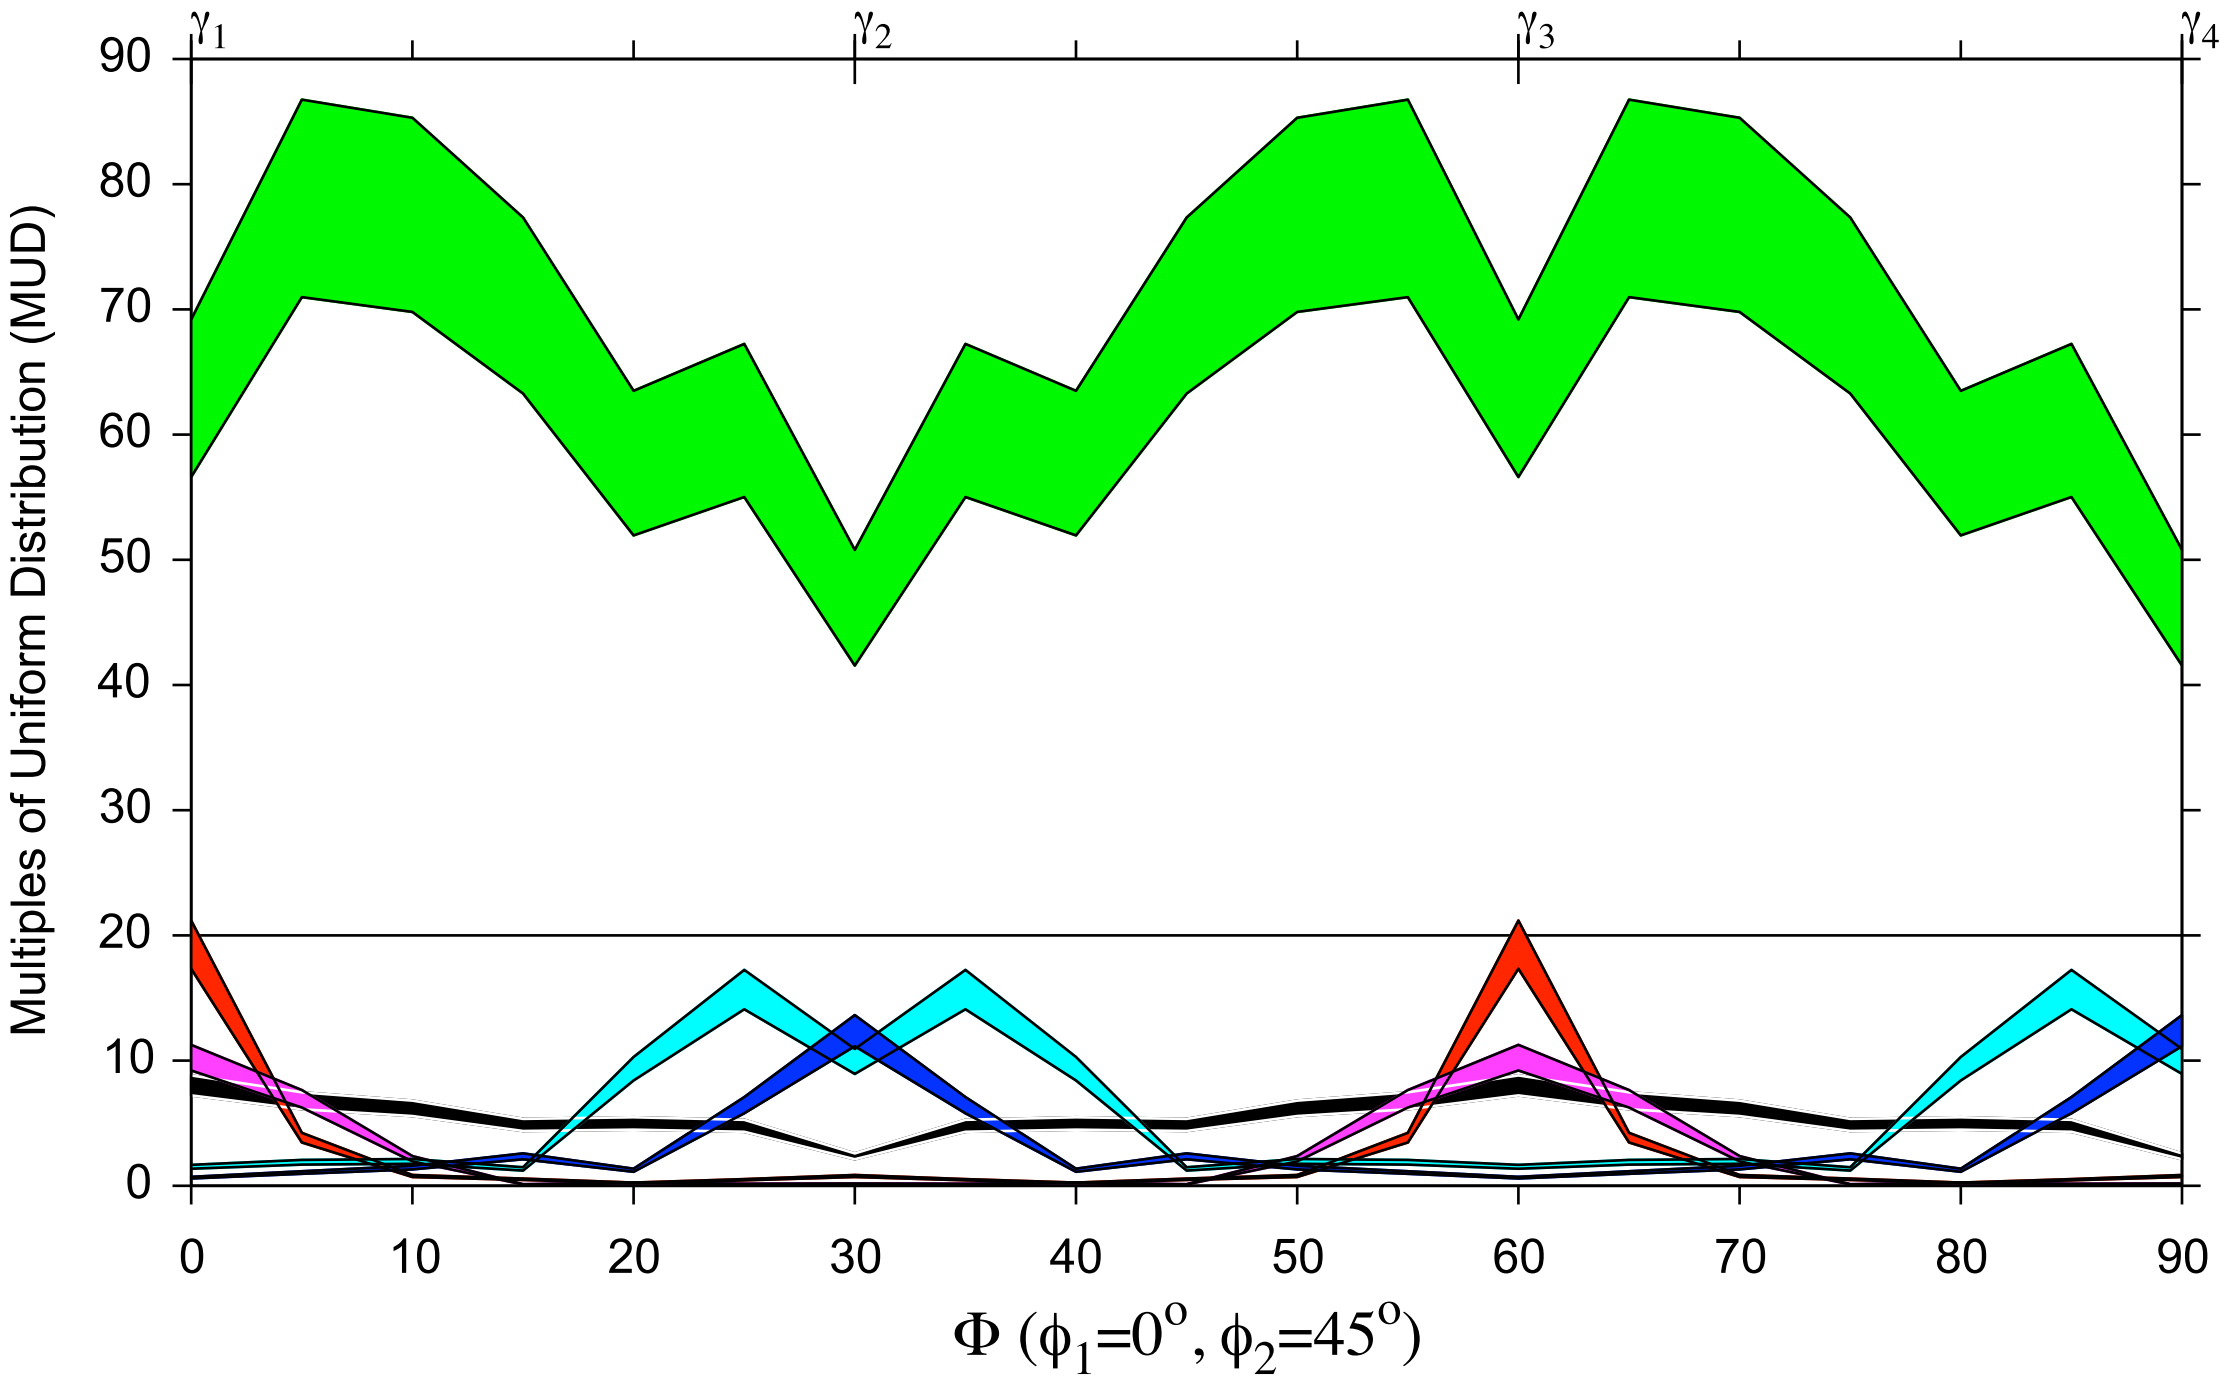

Supplement: MOESM10 [file 11899492]
